# Supplementary material for: Pd nanoparticles supported on hierarchically porous carbons derived from assembled nanoparticles of a zeolitic imidazolate framework (ZIF-8) for methanol electrooxidation
Source: Royal Society of Chemistry journal article supplement (doi:10.1039/c5cc03008k), 2015-01-01
Supplement: c5cc03008k1.pdf [file c5cc03008k1.pdf]

## Electronic Supplementary Information

### **Pd nanoparticles supported on hierarchically porous carbon derived from assembled nanoparticles of zeolitic imidazolate framework (ZIF-8) for methanol electrooxidation**

Jun Li,<sup>ab</sup> Qi-Long Zhu,<sup>a</sup> and Qiang Xu<sup>\* ab</sup>

<sup>a</sup> *National Institute of Advanced Industrial Science and Technology (AIST), Ikeda, Osaka, Japan.*

*Fax: +81-72-751-9628; Tel: +81-72-751-9562; E-mail: q.xu@aist.go.jp*

<sup>b</sup> *Graduate School of Engineering, Kobe University, Nada Ku, Kobe, Hyogo, Japan*

## Experimental Section

### Chemicals and Materials

Methanol ( $\text{CH}_3\text{OH}$ , Tokyo Chemical Industry Co., Ltd., >99.8%), ethanol ( $\text{C}_2\text{H}_5\text{OH}$ , Kishida Chem. Co., >99.8%), hydrochloric acid (Wako Pure Chemical Industries, Ltd., 35.0-37.0%), triethylamine (EA, Chameleon reagent), 2-methylimidazole (MeIM, Tokyo Chemical Industry Co., Ltd.), 5% Nafion<sup>®</sup> Dispersion solution DE 520 CS type (Wako Pure Chemical Industries, Ltd.), Vulcan XC-72R (Carbon, specific surface area =  $240 \text{ m}^2 \text{ g}^{-1}$ , Cabot Corp., USA), zinc nitrate ( $\text{Zn}(\text{NO}_3)_2 \cdot 6\text{H}_2\text{O}$ , Wako Pure Chemical Industries, Ltd.), sodium hydroxide (NaOH, Chameleon Reagent, >98%), potassium hydroxide (KOH, Kishida Chem. Co., >85.0%), sodium borohydride ( $\text{NaBH}_4$ , Sigma-Aldrich, 99%), potassium tetrachloropalladate ( $\text{K}_2\text{PdCl}_4$ , Wako Pure Chemical Industries, Ltd., >97%) were used as received. All reagents were commercial and used without further purification. De-ionized water with a resistivity of  $18.2 \text{ M}\Omega \cdot \text{cm}$  was obtained by reverse osmosis followed by ion-exchange and filtration (RFD 250NB, Toyo Seisakusho Kaisha, Ltd.).

### Synthesis of ZIF-8

A methanolic solution (500 mL) of zinc nitrate ( $\text{Zn}(\text{NO}_3)_2 \cdot 6\text{H}_2\text{O}$ , 7.4350 g) was added into a methanolic solution (500 mL) of 2-methylimidazole (4.1040 g) and triethylamine (9 mL) with ultrasonication for 30 min at room temperature. After that, the turbid solution was centrifuged to give a white solid, which was washed carefully with methanol and then dried at  $80^\circ\text{C}$  for 12 h.

### Preparation of ZIF-8-derived carbon (ZC)

The ZIF-8 sample (2.0 g) was transferred into a ceramic boat and placed into a temperature-programmed furnace under flowing Ar for 3 h to exclude air. Subsequently, the sample was heated from room temperature to 800, 900, 1000, or  $1100^\circ\text{C}$  in 1.5 h, and then kept at the temperature for 8 h. After cooled down to room temperature under an argon flow, the resultant black materials were washed several times with a HCl (10 vol % in water) solution to remove the residual ZnO and/or Zn species, then washed with de-ionized water and dried at  $80^\circ\text{C}$  for 12 h to afford ZIF-8-derived carbon (denoted as ZC-800, ZC-900, ZC-1000, and ZC-1100) (over 0.4 g). The product yield of ZCs is over 20%.

### Syntheses of Pd/ZC and Pd/XC-72R catalysts

The Pd catalyst supported by ZC or XC-72R was synthesized by a facile sodium hydroxide-assisted reduction method reported recently.<sup>1</sup> Generally, 50 mg of ZC or XC-72R carbon powder dispersed in 1.25 mL of water was mixed with an aqueous solution of  $\text{K}_2\text{PdCl}_4$  (0.30 M, 0.15 mL) and subsequently the aqueous suspension was further homogenized under ultrasonication for 30 min. Then 10 mg of  $\text{NaBH}_4$  dissolved in 0.25 mL of 2.0 M NaOH solution was added into the above

obtained suspension with vigorous shaking. In order to fully deposit the metallic nanoparticles onto the support, the mixture was shaken for another half an hour. Finally, the desired catalyst Pd/ZC or Pd/XC-72R was collected by centrifuging and washed with de-ionized water for several times and then dried under vacuum at 80 °C.

### **Instrumentation**

Powder X-ray diffraction (PXRD) measurements were carried out on a Rigaku Ultima IV X-ray diffractometer with Cu K $\alpha$  source (40 kV, 40 mA,  $\lambda$  = 0.154 nm). The surface area measurements were performed with N<sub>2</sub> adsorption/desorption isotherms at liquid nitrogen temperature (77 K) using automatic volumetric adsorption equipment (Belsorp-max) after dehydration under vacuum at 150 °C for 12 h. The pore volume was calculated by a single point method at  $P/P_0 = 0.99$ . Scanning electron microscopic (SEM) analyses were carried with a Hitachi S-5000 field emission scanning electron microscope. Transmission electron microscope (TEM, TECNAI G<sup>2</sup> F20) equipped with energy dispersed X-ray detector (EDX) was applied for the detailed microstructure and composition information for the prepared samples. X-ray photoelectron spectroscopic (XPS) measurements were performed on a Shimadzu ESCA-3400 X-ray photoelectron spectrometer using an Mg K $\alpha$  source (1253.6 eV) operating at 10 kV and 10 mA. Raman spectra were recorded on a Jobin-Yvon T64000 Raman system at room temperature at an excitation wavelength of 532 nm.

### **Electrode preparation and electrochemical performance test**

Electrochemical properties of the catalysts were measured on a Solartron electrochemical workstation (SI1287) using a conventional three-electrode system with a catalyst modified glassy carbon (GC,  $\Phi$  = 3 mm) working electrode, a platinum wire counter electrode and a saturated calomel reference electrode (SCE). Before the surface coating, the GC electrode was polished with 0.5 and 0.05  $\mu$ m alumina suspensions, followed by washing ultrasonically with HNO<sub>3</sub>-H<sub>2</sub>O (1:1, v/v ratio) solution, ethanol and deionizer water sequentially. 15 mg of carbon-supported Pd catalyst, 0.8 mL of H<sub>2</sub>O, 0.2 mL of ethanol and 24  $\mu$ L of Nafion solution (5 wt%) were mixed under ultrasonication for 1 h. Then 3  $\mu$ L of the homogeneously mixed catalyst ink was dropped on the surface of the GC electrode by using a micropipette and dried at room temperature for 4 h. The Pd loading on the electrode was controlled at 0.054 mg cm<sup>-2</sup>. Before measurement, the electrolyte (1 M KOH or 1 M KOH + 1 M CH<sub>3</sub>OH solution) was first de-aerated with highly pure N<sub>2</sub> for half an hour. All electrochemical measurements were performed at ambient temperature (~25 °C). The electrochemical impedance spectroscopy (EIS) was performed in 1 M KOH + 1 M CH<sub>3</sub>OH solution at a constant potential of -0.4 V in the frequency range between 100 kHz and 20 mHz on the same Solartron electrochemical workstation (SI1287) with the Solartron impedance/gain-phase analyzer (SI1260).

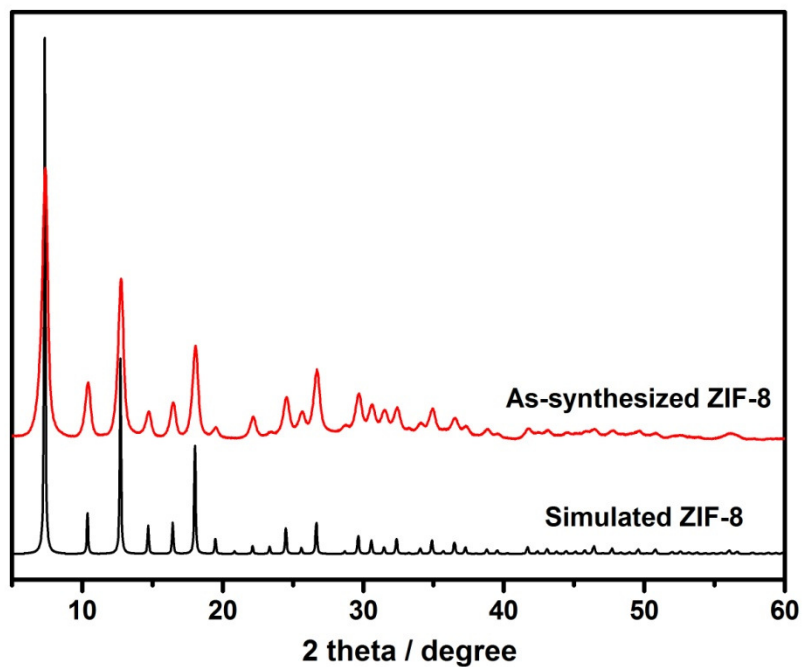

**Fig. S1** Powder XRD patterns of ZIF-8.

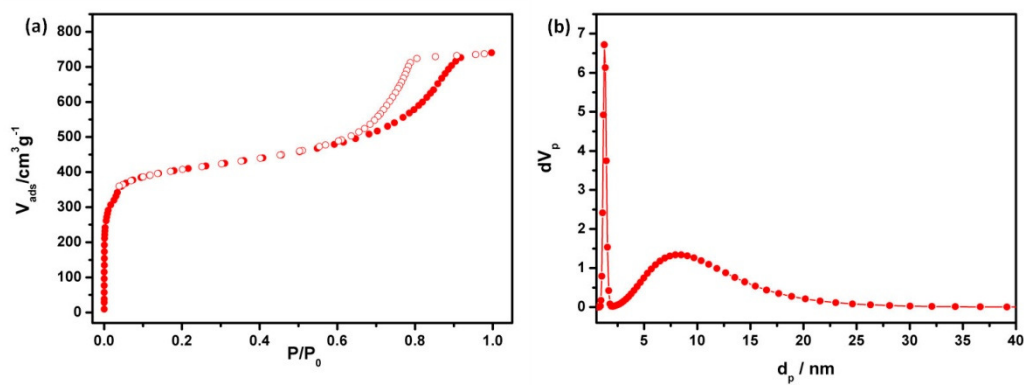

**Fig. S2** (a)  $N_2$  sorption isotherms at 77 K (Filled and open symbols represent adsorption and desorption branches, respectively), and (b) the corresponding NL-DFT pore size distribution of the assembled nanoparticles of ZIF-8.

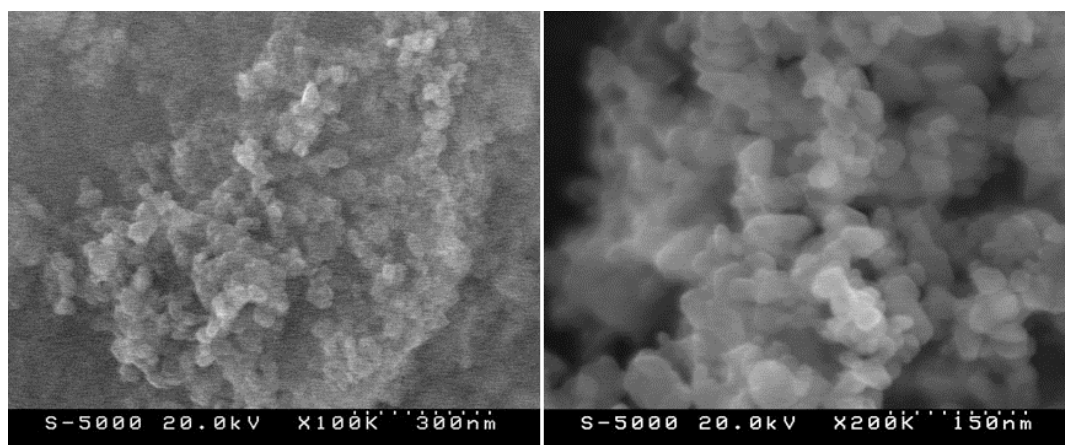

**Fig. S3** The SEM images of the assembled nanoparticles of ZIF-8.

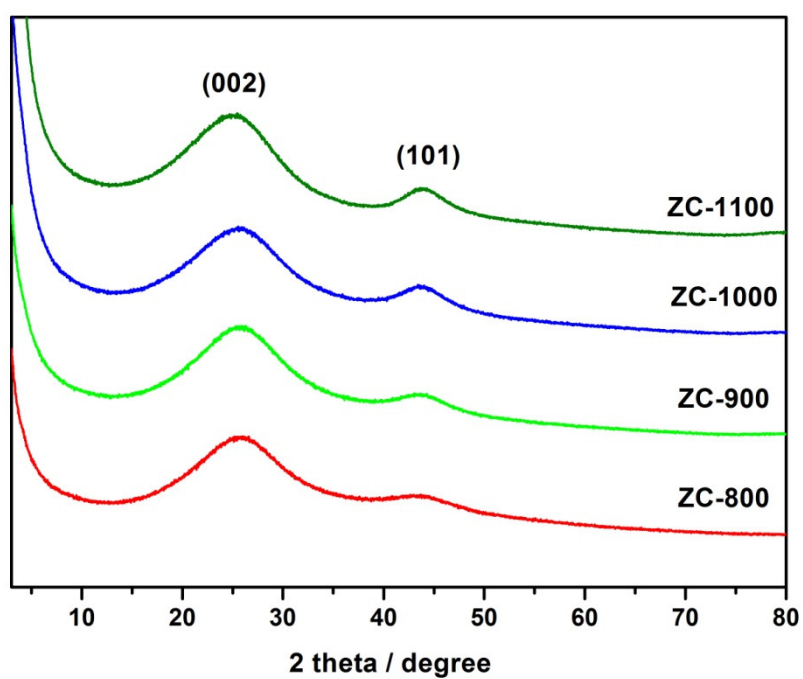

**Fig. S4** Powder XRD patterns of carbon materials prepared by carbonization of assembled nanoparticles of ZIF-8 at various temperatures.

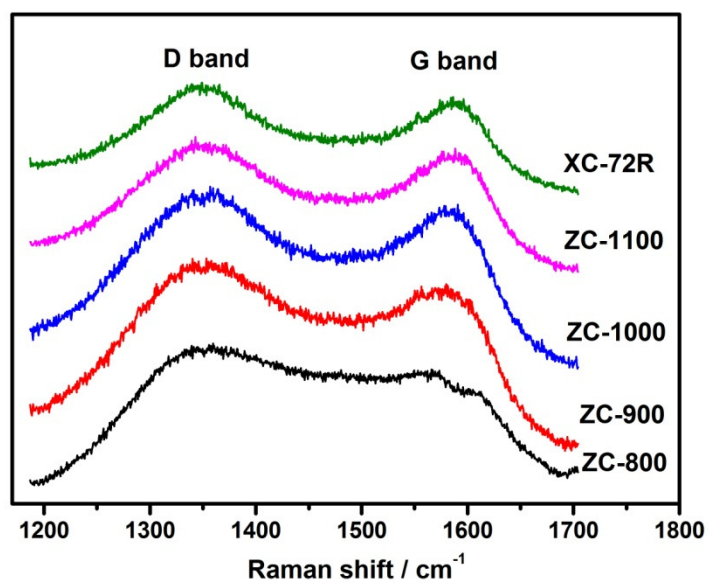

**Fig. S5** Raman spectra of carbon materials prepared by carbonization of assembled nanoparticles of ZIF-8 at various temperatures and carbon black Vulcan XC-72R.

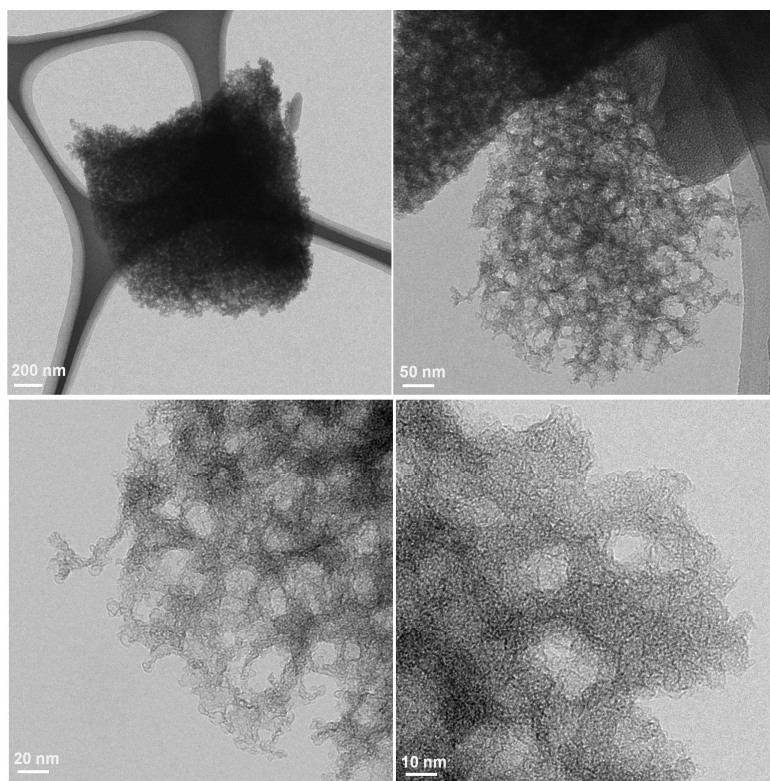

**Fig. S6** TEM images of ZC-1000 at different magnifications.

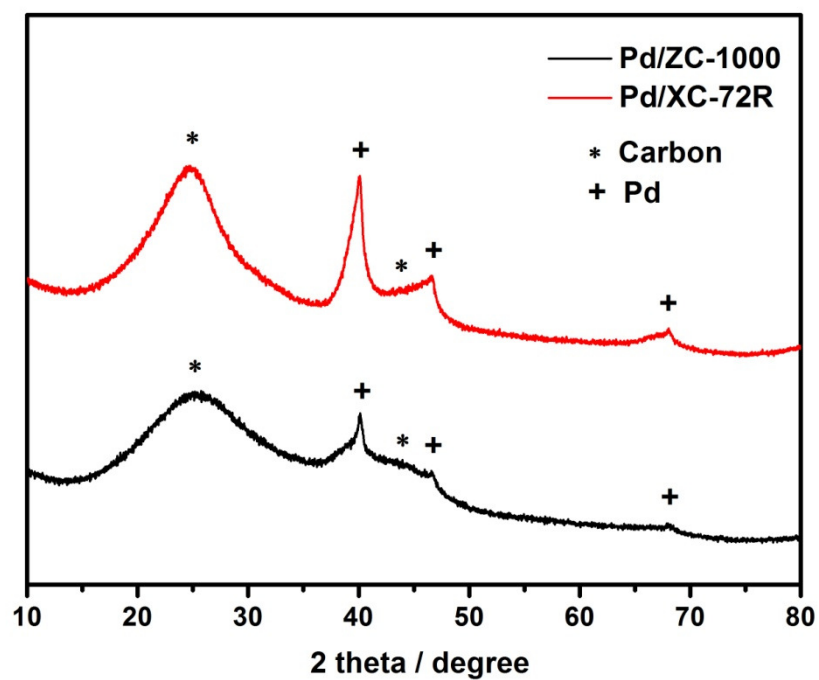

**Fig. S7** Powder XRD patterns of Pd/ZC-1000 and Pd/XC-72R..

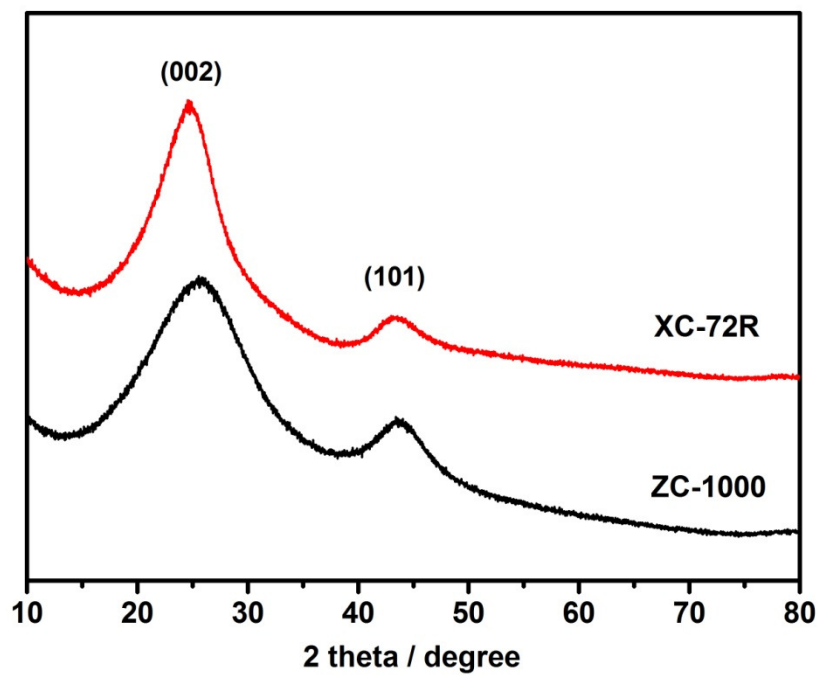

**Fig. S8** Powder XRD patterns of ZC-1000 and XC-72R.

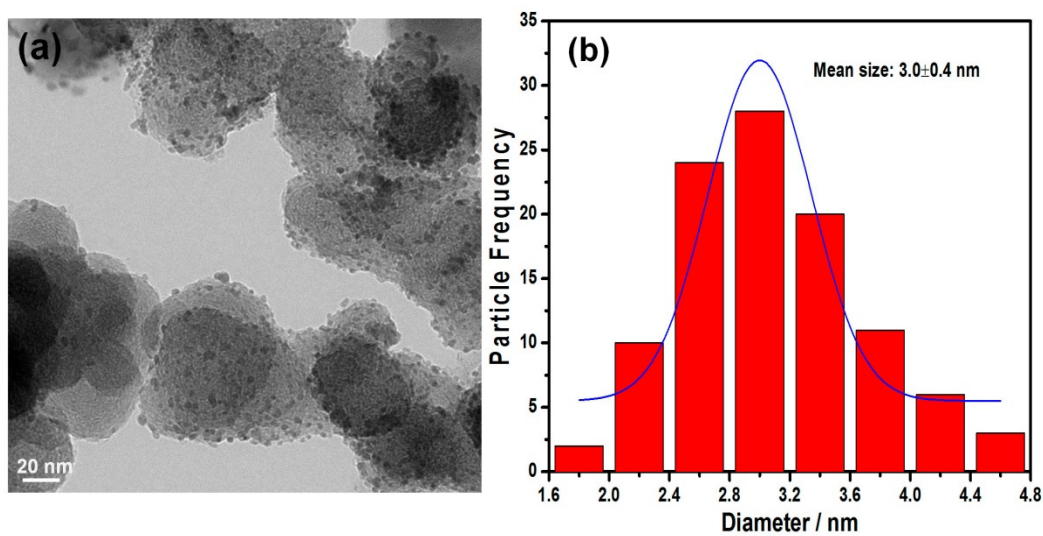

**Fig. S9** (a) TEM image and (b) the corresponding particle size distribution histogram of Pd/XC-72R.

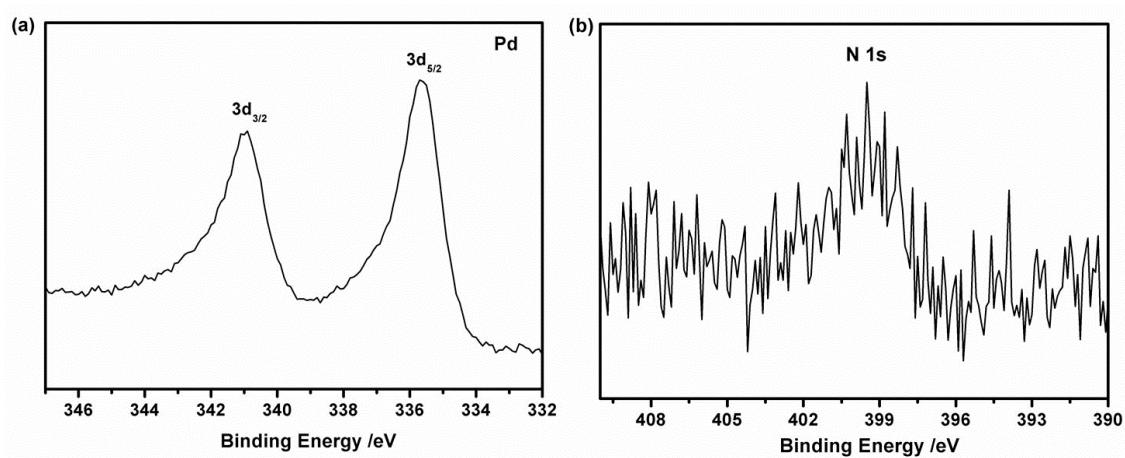

**Fig. S10** XPS spectra for Pd/ZC-1000 at (a) Pd  $3d_{3/2}$  and  $3d_{5/2}$  and (b) N 1s levels.



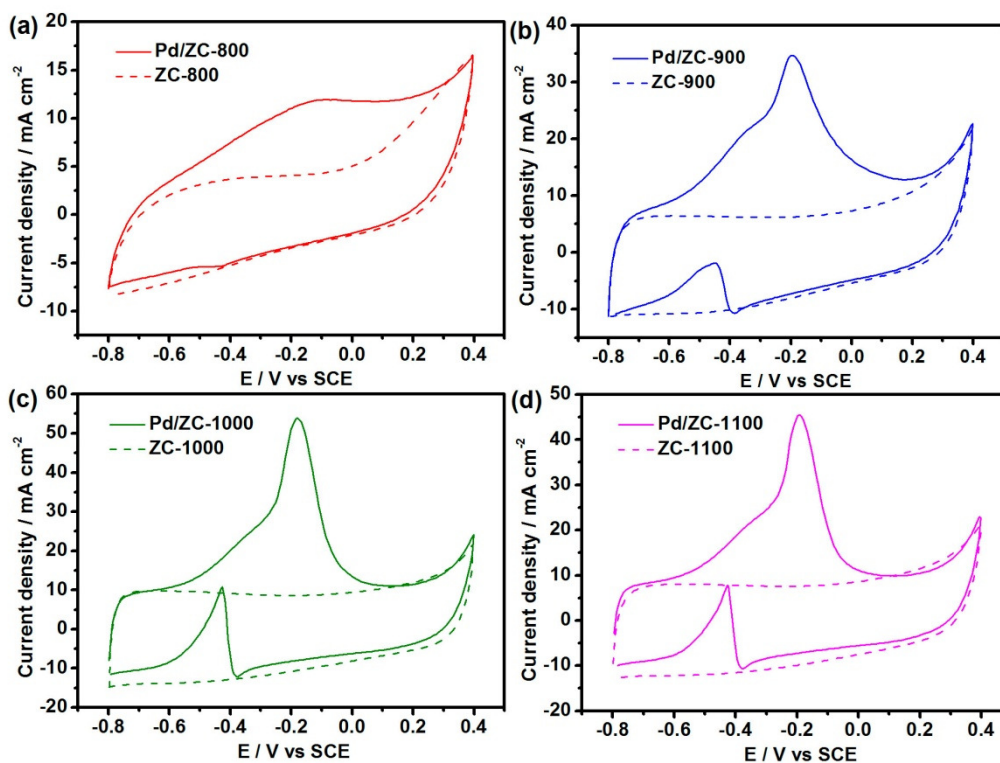

**Fig. S11** Cyclic voltammograms of Pd/ZC and ZC electrodes in 1 M KOH solution containing 1 M  $\text{CH}_3\text{OH}$  with sweep rate of  $50 \text{ mV s}^{-1}$  at room temperature. Pd loading:  $0.054 \text{ mg cm}^{-2}$ .

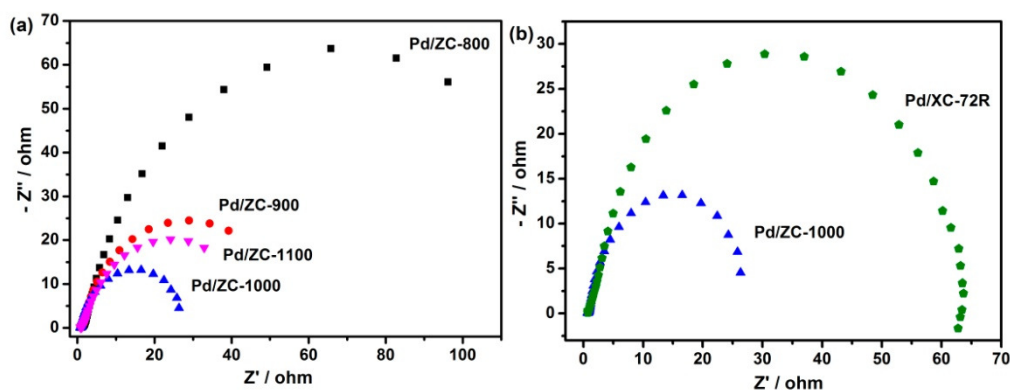

**Fig. S12** The Nyquist plot of (a) Pd/ZC electrodes and (b) Pd/XC-72R and Pd/ZC-1000 electrodes in 1 M KOH containing 1 M  $\text{CH}_3\text{OH}$  at  $-0.4 \text{ V}$ .

**Table S1** Summary of the surface areas and pore volume distributions for the carbons

| Sample  | Specific surface area <sup>[a]</sup><br>(m <sup>2</sup> g <sup>-1</sup> ) | Total pore volume <sup>[b]</sup><br>(cm <sup>3</sup> g <sup>-1</sup> ) | Mesopore volume <sup>[c]</sup><br>(cm <sup>3</sup> g <sup>-1</sup> ) | Micropore volume <sup>[d]</sup><br>(cm <sup>3</sup> g <sup>-1</sup> ) |
|---------|---------------------------------------------------------------------------|------------------------------------------------------------------------|----------------------------------------------------------------------|-----------------------------------------------------------------------|
| ZC-1100 | 1029                                                                      | 0.851                                                                  | 0.487                                                                | 0.364                                                                 |
| ZC-1000 | 1105                                                                      | 0.952                                                                  | 0.583                                                                | 0.369                                                                 |
| ZC-900  | 1020                                                                      | 0.871                                                                  | 0.531                                                                | 0.340                                                                 |
| ZC-800  | 914                                                                       | 0.726                                                                  | 0.376                                                                | 0.350                                                                 |
| XC-72R  | 240                                                                       | 0.278                                                                  | 0.226                                                                | 0.052                                                                 |

[a] Calculated from the BET surface area analysis.

[b] Calculated by a single point method at P/P<sub>0</sub> = 0.99.

[c] Calculated using a t-plot method.

[d] Calculated by subtracting the total pore volume with the mesopore volumes.

**Table S2** The forward anodic peak current density in CVs (specific activity  $I_f$  and mass activity  $j_f$ ), and the current density at the time of 3000 s in chronoamperometry ( $I_s$ ) for the methanol electrooxidation over different catalysts

| Catalysts  | Specific activity $I_f$<br>(mA cm <sup>-2</sup> ) | Mass activity $j_f$<br>(mA mg <sup>-1</sup> ) | $I_s$<br>(mA cm <sup>-2</sup> ) |
|------------|---------------------------------------------------|-----------------------------------------------|---------------------------------|
| Pd/ZC-1100 | 37.86                                             | 701.1                                         | 2.09                            |
| Pd/ZC-1000 | 45.20                                             | 837.0                                         | 4.36                            |
| Pd/ZC-900  | 28.42                                             | 526.3                                         | 1.75                            |
| Pd/ZC-800  | 7.64                                              | 141.5                                         | 1.28                            |
| Pd/XC-72R  | 9.20                                              | 170.4                                         | 0.13                            |

**Table S3** The forward anodic peak current density (specific activity  $I_f$  and mass activity  $j_f$ ) in CVs of the Pd catalyst supported on different carbon materials for methanol electrooxidation in alkaline media

| Catalyst electrodes                       | Solutions               | Scan rate<br>(mV s <sup>-1</sup> ) | $I_f$<br>(mA cm <sup>-2</sup> ) | $j_f$<br>(mA mg <sup>-1</sup> ) | Ref.      |
|-------------------------------------------|-------------------------|------------------------------------|---------------------------------|---------------------------------|-----------|
| Pd/CMS <sup>[a]</sup> /CRE <sup>[b]</sup> | 1.0 M MeOH + 1.0 M KOH  | 5                                  | 50                              | 500                             | 2a        |
| Pd/graphite block                         | 1.0 M MeOH + 0.5 M NaOH | 50                                 | 40                              | 80                              | 2b        |
| Pd/PVP-graphene/GCE <sup>[c]</sup>        | 0.5 M MeOH + 1.0 M NaOH | 100                                | 1.08                            | 8.0                             | 2c        |
| Pd/CNTs <sup>[d]</sup> /GCE               | 0.5 M MeOH + 1.0 M KOH  | 50                                 | 34.1                            | 274.5                           | 2d        |
| Pd/VrGO <sup>[e]</sup> /GCE               | 1.0 M MeOH + 1.0 M KOH  | 50                                 | —                               | 620.1                           | 2e        |
| Pd/ZC-1000/GCE                            | 1.0 M MeOH + 1.0 M KOH  | 50                                 | 45.20                           | 837.0                           | This work |
| Pd/XC-72R/GCE                             | 1.0 M MeOH + 1.0 M KOH  | 50                                 | 9.20                            | 170.4                           | This work |

[a] carbon microspheres.

[b] carbon rod electrode.

[c] glassy carbon electrode.

[d] carbon naotubes.

[e] vertically oriented reduced graphene oxide.

## References

- 1 Q.-L. Zhu, N. Tsumoria and Q. Xu, *Chem. Sci.*, 2014, **5**, 195.
- 2 (a) C. Xu, Y.-L. Liu and D.-S. Yuan, *Int. J. Electrochem. Sci.*, 2007, **2**, 674; (b) S. S. Mahapatra and J. Datta, *Int. J. Electrochem.*, 2011, **2011**, 1; (c) Y.-T. Zhang, H.-H. Shu, G. Chang, K. Ji, M. Oyama, X. Liu and Y.-B. He, *Electrochimica Acta*, 2013, **109**, 570; (d) F.-C. Zhu, G.-S. Ma, Z.-C. Bai, R. Q. Hang, B. Tang, Z.-H. Zhang and X.-G. Wang, *J. Power Sources*, 2013, **242**, 610; (e) L.-M. Yang, Y.-H. Tang, S.-L. Luo, C.-B. Liu, H.-J. Song and D.-F. Yan, *ChemSusChem*, 2014, **7**, 2907.
